# Supplementary material for: Paramecium BBS genes are key to presence of channels in Cilia
Source: PubMed Central journal article supplement (PMC3556005; doi:10.1186/2046-2530-1-16), 2012-09-03

### A. FLAG-BBS9 Immunoprecipitation

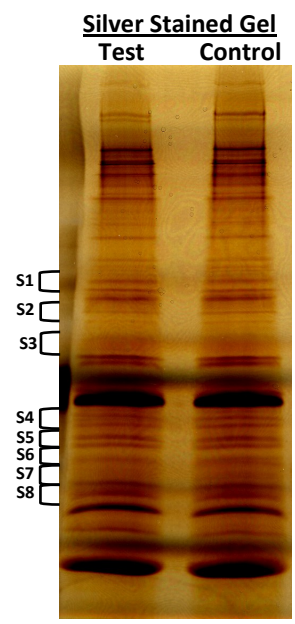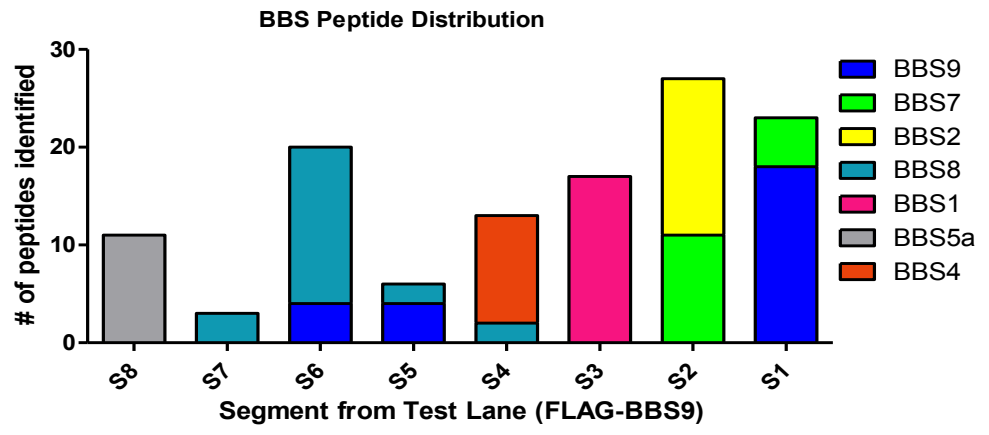

### B. FLAG-BBS8 Immunoprecipitation

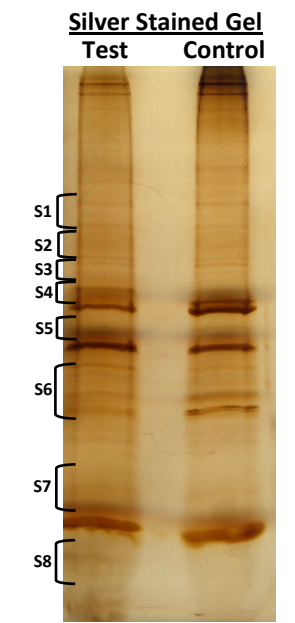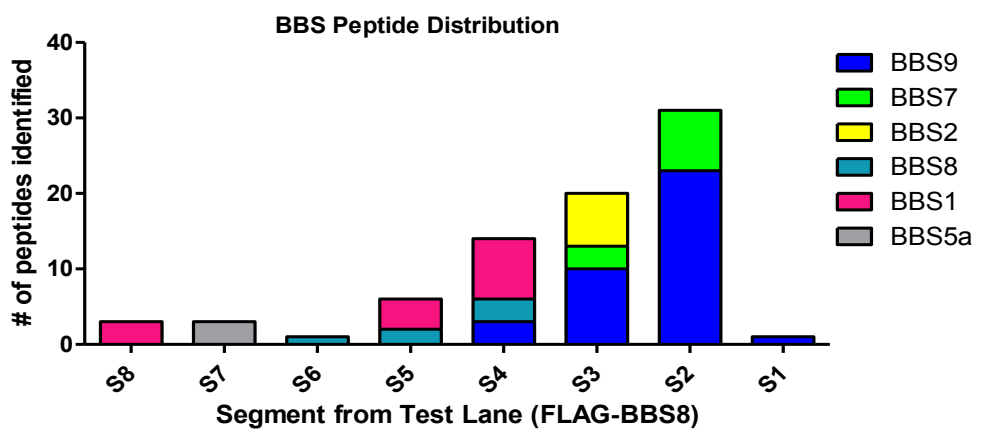

Supplement: 2046-2530-1-16-S3.pdf [file 2046-2530-1-16-S3.pdf]
