# Supplementary material for: Paramecium BBS genes are key to presence of channels in Cilia
Source: PubMed Central journal article supplement (PMC3556005; doi:10.1186/2046-2530-1-16), 2012-09-03

**BBS7**

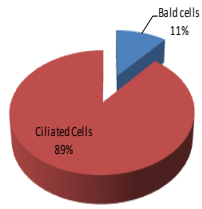

**BBS8**

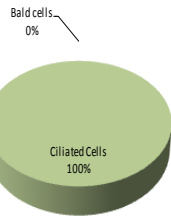

**BBS9**

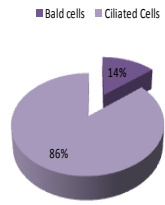

Supplement: 2046-2530-1-16-S7.pdf [file 2046-2530-1-16-S7.pdf]
