# Supplementary material for: Paramecium BBS genes are key to presence of channels in Cilia
Source: PubMed Central journal article supplement (PMC3556005; doi:10.1186/2046-2530-1-16), 2012-09-03

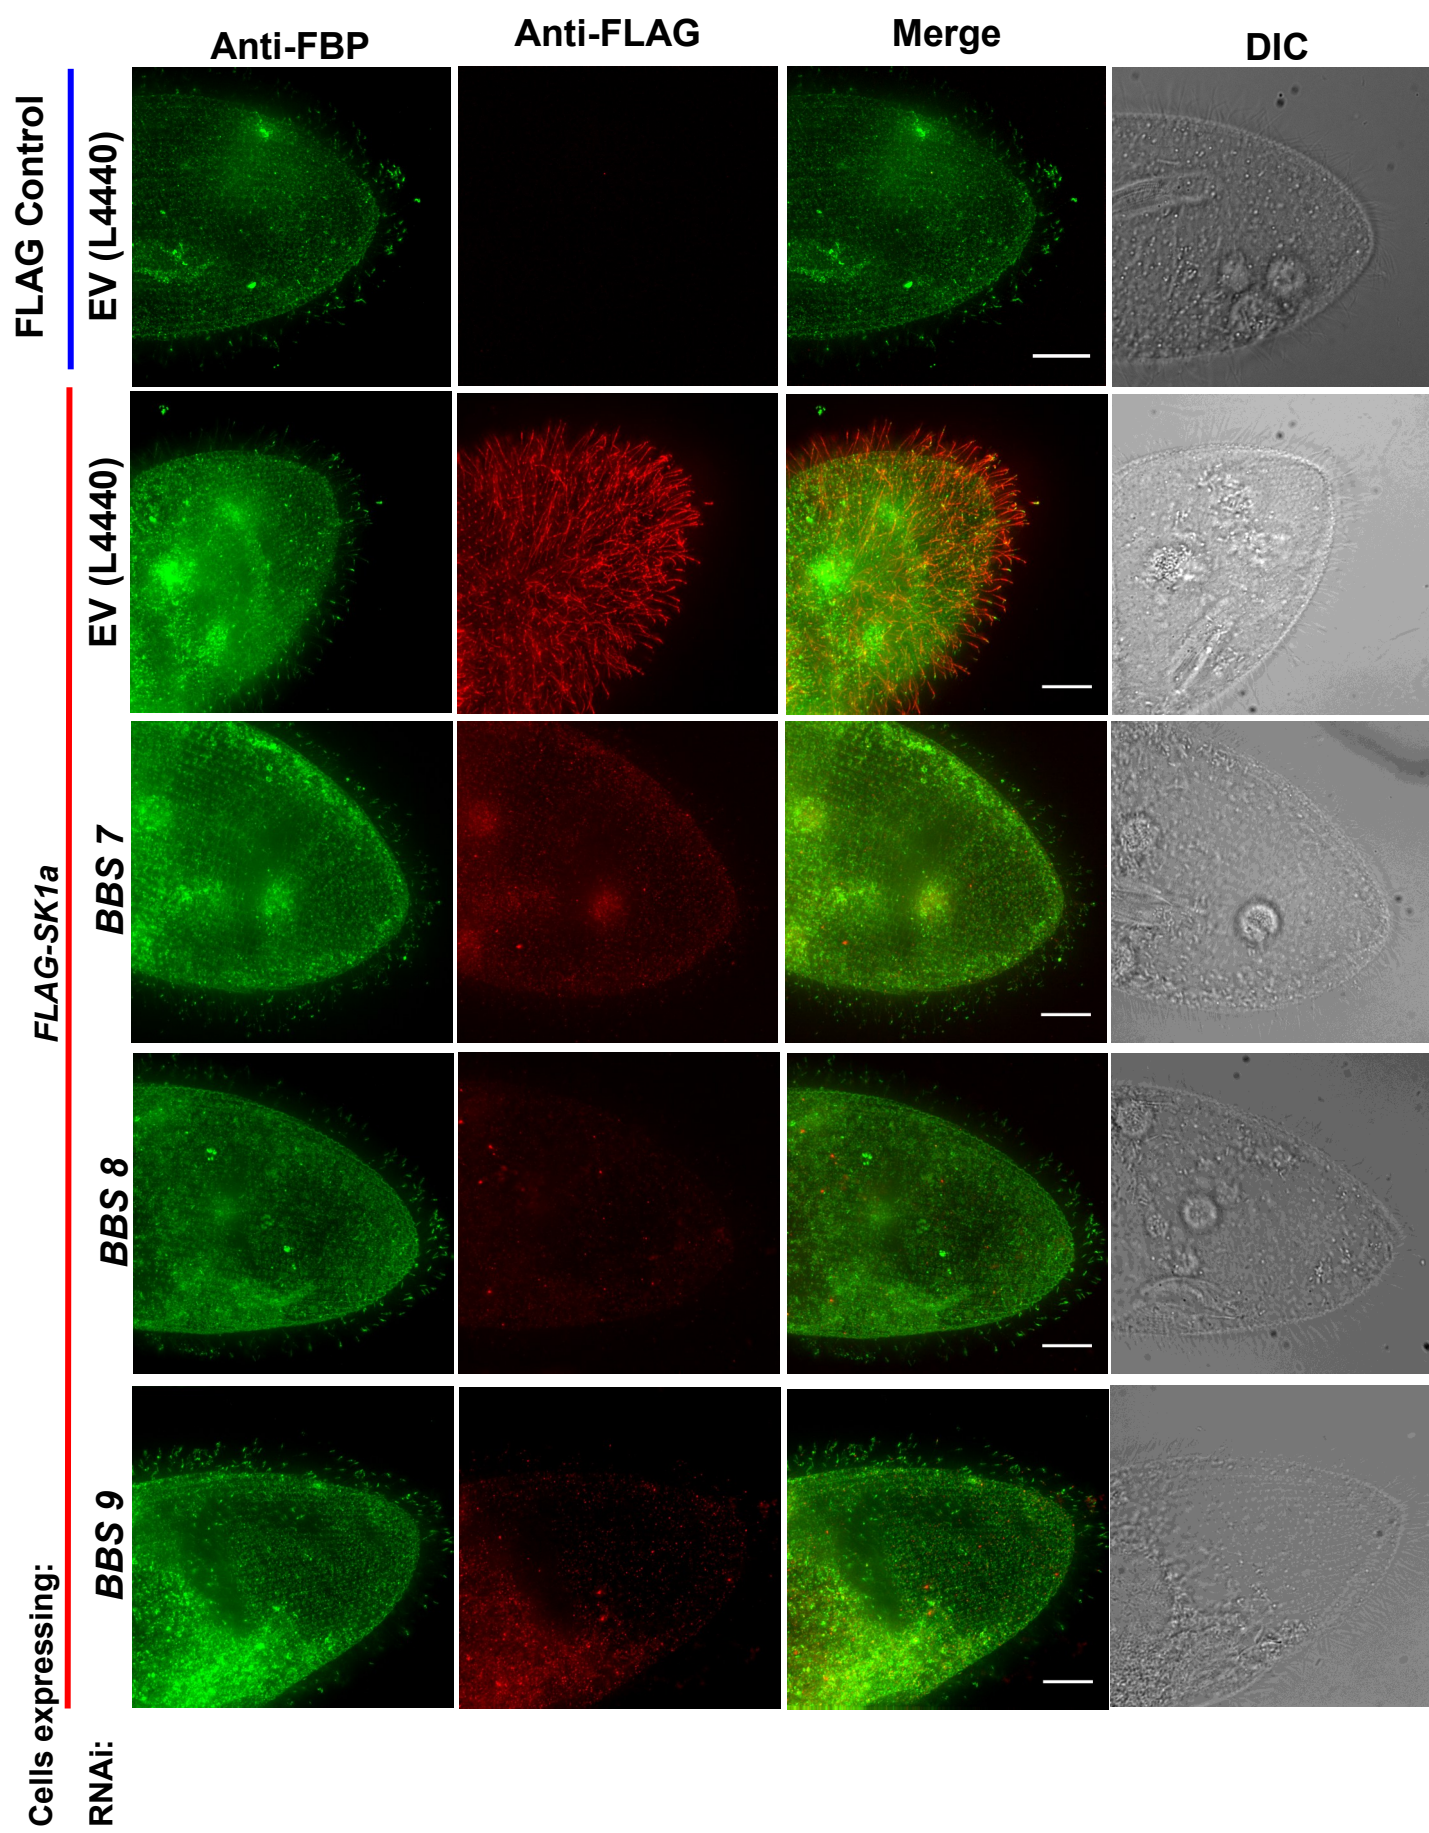

Supplement: 2046-2530-1-16-S9.pdf [file 2046-2530-1-16-S9.pdf]
